# Supplementary material for: Is specific IgE antibody analysis feasible for the diagnosis of methylenediphenyl diisocyanate-induced occupational asthma?
Source: PubMed Central journal article supplement (PMC3633778; doi:10.1007/s00420-012-0772-6), 2012-04-28

## Isocyanat asthma diagnostic flow chart

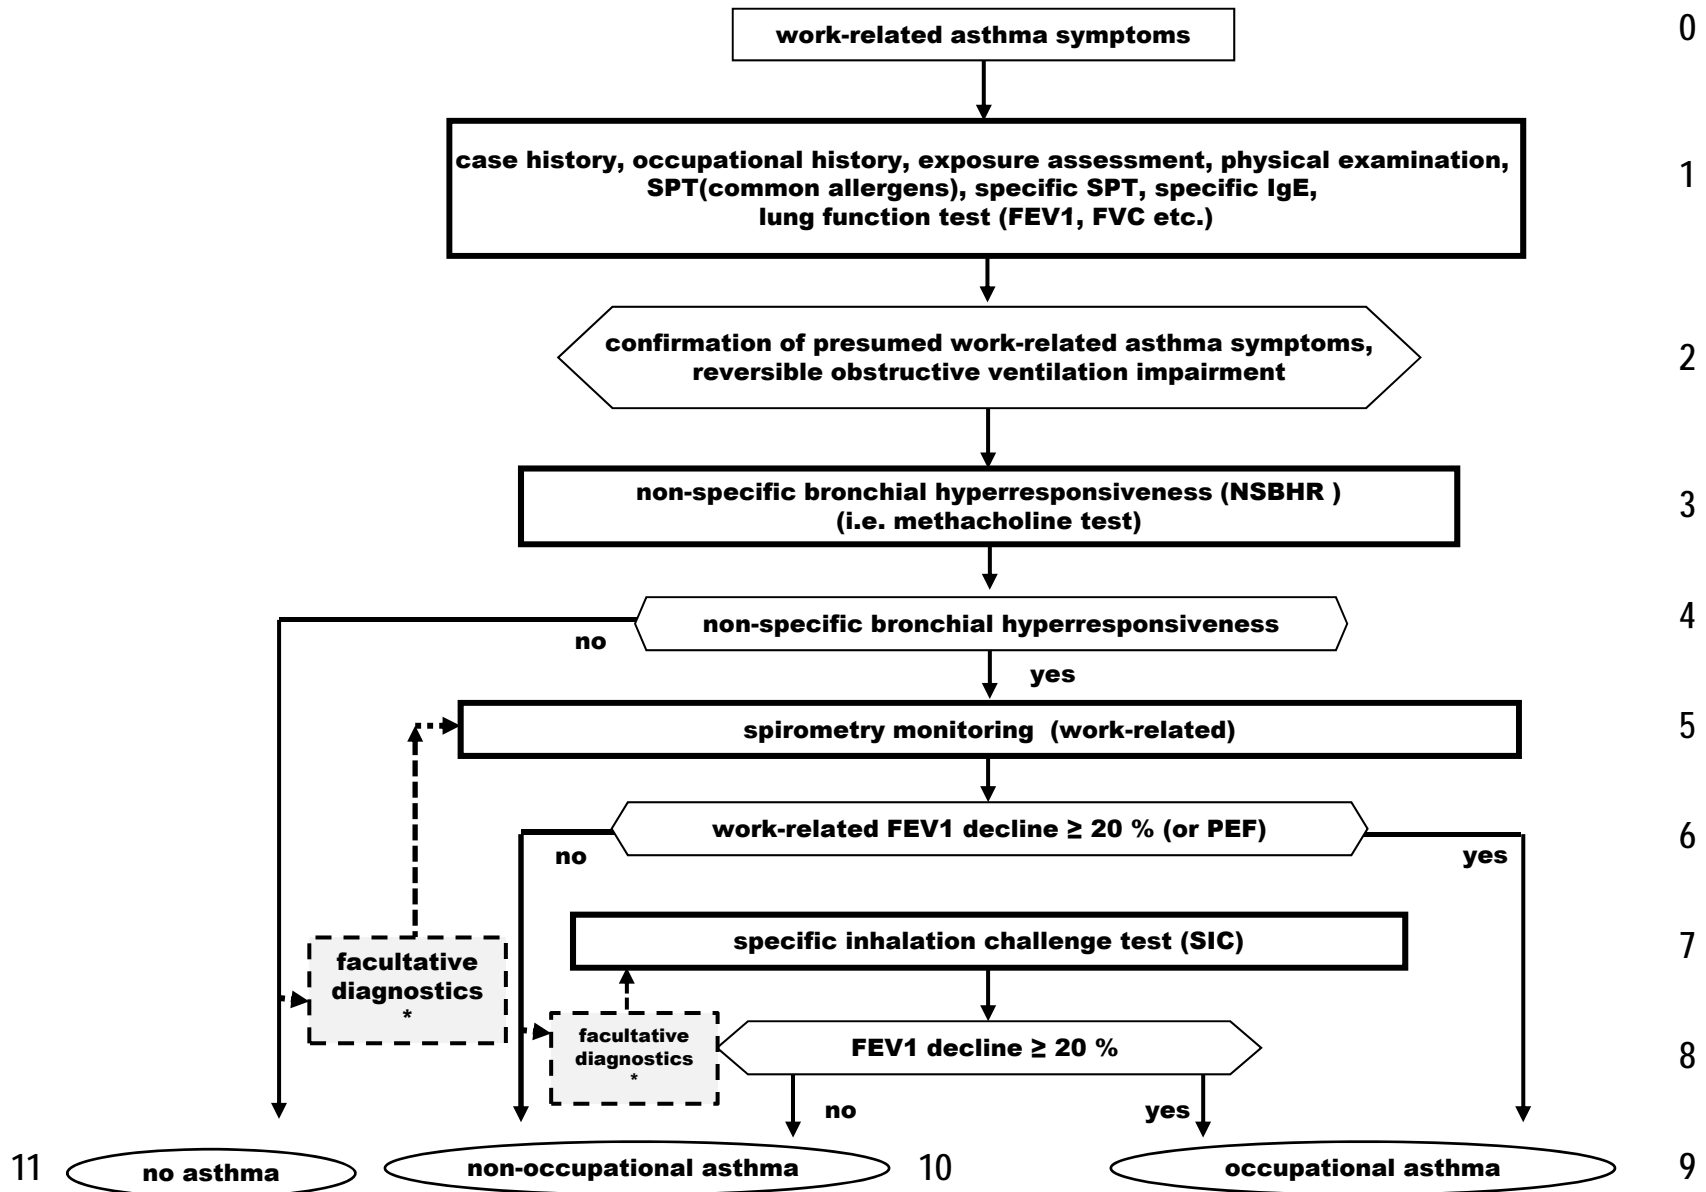

Supplement: 420_2012_772_MOESM1_ESM.pdf [file 420_2012_772_MOESM1_ESM.pdf]
